# Supplementary material
Source: publisher site journal article supplement (https://www.spandidos-publications.com/7637/downloadSupplementary)
Supplement: Supplementary file 1 [file downloadSupplementary]

Table SI. Primer sequences for reverse transcription-quantitative PCR.

| Name             | Forward primer (5'-3')    | Reverse primer (5'-3')    |
|------------------|---------------------------|---------------------------|
| hNLRP3           | GCTTGCCGACGATGCCTTCC      | GCTGTCATTGTCTGGTGTCTTCC   |
| hCaspase-1       | CACAAGAAGGGAGGAGAGAAAAGCC | TTCACCCATGGAACGGATAAACAGC |
| hASC             | TGGACGCCTTGGACCTCACC      | ATGTCGCGCAGCACGTTAGC      |
| hIL-18           | GCTAAAGCGGCTGCCACCTG      | AGGAAGCGATCTGGAAGGTCTGAG  |
| hIL-1 $\beta$    | GGACAGGATATGGAGCAACAAGTGG | TCATCTTTCAACACGCAGGACAGG  |
| hRev-erba        | ACCAGACAGTGATGTTCCCTAAG   | CTTCTCGCTGAAGTCGAACAT     |
| h $\alpha$ -SMA  | AAGAGCTACGAGCTGCCAGAC     | ACATGACGTTGTTGGCATAACAG   |
| hTGF- $\beta$ 1  | AGCAACAATTCCTGGCGATAC     | GCCCTCAATTTCCCCTCC        |
| h $\beta$ -actin | GCCACCACCGCCGAG           | AGGGTGAGGATGCCTCTCTT      |
| mNLRP3           | GCTGCGATCAACAGGCGAGAC     | CCATCCACTCTTCTTCAAGGCTGTC |
| mCaspase-1       | ATACAACCACTCGTACACGTCTTGC | TCCTCCAGCAGCAACTTCATTTCTC |
| mASC             | GGACGGAGTGCTGGATGCTTTG    | CATCTTGTCTTGGCTGGTGGTCTC  |
| mIL-18           | CAAAGTGCCAGTGAACCCCAGAC   | ACAGAGAGGGTCCAGCCAGTC     |
| mIL-1 $\beta$    | CACTACAGGCTCCGAGATGAACAAC | TGTCGTTGCTTGGTTCTCCTTGAC  |
| mRev-erba        | AAGCAAAGCGCACCATCAG       | GTTTGCCAAACACATCCCG       |
| m $\alpha$ -SMA  | CCCTGAAGAGCATCCGACA       | CTCCAGAGTCCAGCACAAATACC   |
| mTGF- $\beta$ 1  | GGCGGTGCTCGCTTTGTA        | GATGGCGTTGTTGCGGTC        |
| m $\beta$ -actin | GAGACCTTCAACACCCCAGC      | ATGTCACGCACGATTTCCC       |

H, human; m, mouse; ASC, apoptosis associated speck; IL, interleukin; Rev-erba, nuclear receptor subfamily 1 group D member 1; NLRP3, NLR family domain containing protein 3; SMA, smooth muscle actin; TGF- $\beta$ 1, transforming growth factor- $\beta$ 1.
